# Supplementary material for: Xiao Yao San against Corticosterone‐Induced Stress Injury via Upregulating Glucocorticoid Receptor Reaction Element Transcriptional Activity
Source: Hindawi journal article supplement (doi:10.1155/2016/5850739), 2016-01-01
Supplement: f2 [file 5850739.f2.pdf]

## Supplementary information

### **Xiao Yao San against corticosterone-induced stress injury in primary hippocampal neurons cells via upregulating glucocorticoid receptor reaction element transcriptional activity**

Cao Guo-ping<sup>1</sup>, Shenglan Gong<sup>2</sup>, Fengxue Zhang<sup>3\*</sup>, FU Wen-jun<sup>3\*</sup>

<sup>1</sup>Guangzhou University of Chinese Medicine, Guangzhou, Guangdong 510006, China;

<sup>2</sup>Shenzhen Clinical Medical College of Guangzhou University of Chinese Medicine, Shenzhen, Guangdong 518000;

<sup>3</sup>School of basic medical science, Guangzhou University of Chinese Medicine, Guangzhou, Guangdong 510006, China;

Cao Guo-ping, Email: [cap250722@163.com](mailto:cap250722@163.com);

Shenlan Gong, Email: [1033713420@qq.com](mailto:1033713420@qq.com);

Fengxue Zhang, Email: [zhangfengxue@gzucm.edu.cn](mailto:zhangfengxue@gzucm.edu.cn);

FU Wen-jun, Email: [fuqingzhu2006@163.com](mailto:fuqingzhu2006@163.com);

*Corresponding author:* school of basic medical science, Guangzhou University of Chinese Medicine, Guangzhou, Guangdong 510006, China; Fax: +862039358024; E-mail: [zhangfengxue@gzucm.edu.cn](mailto:zhangfengxue@gzucm.edu.cn); E-mail: [fuqingzhu2006@163.com](mailto:fuqingzhu2006@163.com)

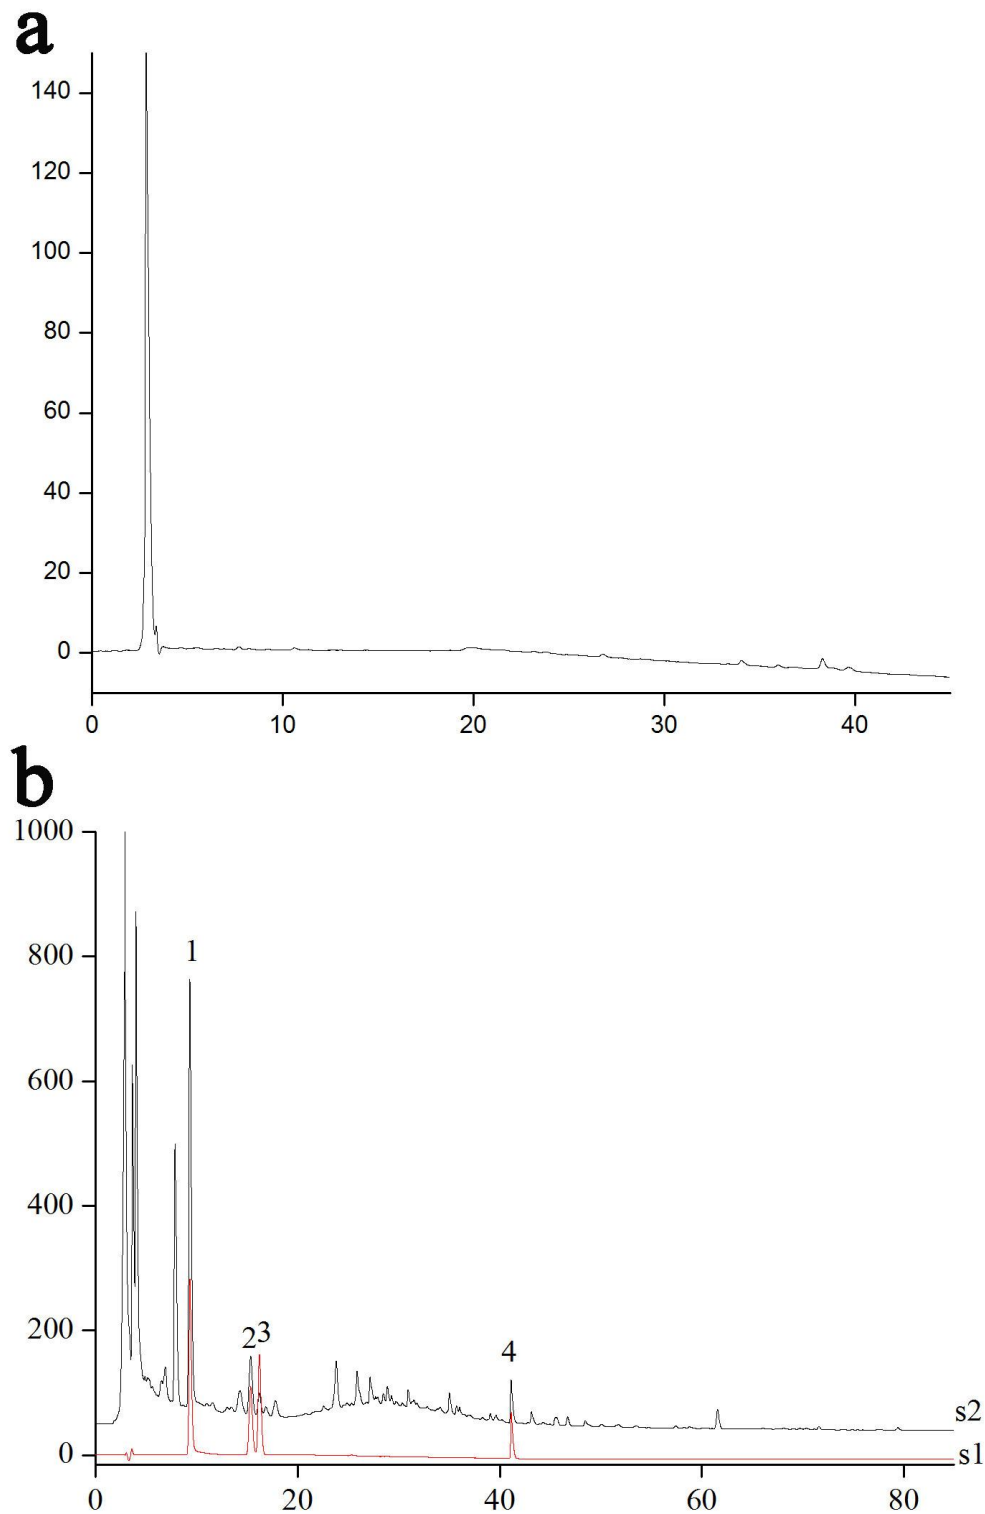

**Figure 1** (a) HPLC chromatogram of blood serum. (b) HPLC chromatogram of four matched references in XYS sample. 1, 2, 3, and 4 represent paeoniflorin, liquiritin, ferulic acid and glycyrrhizic acid, respectively.

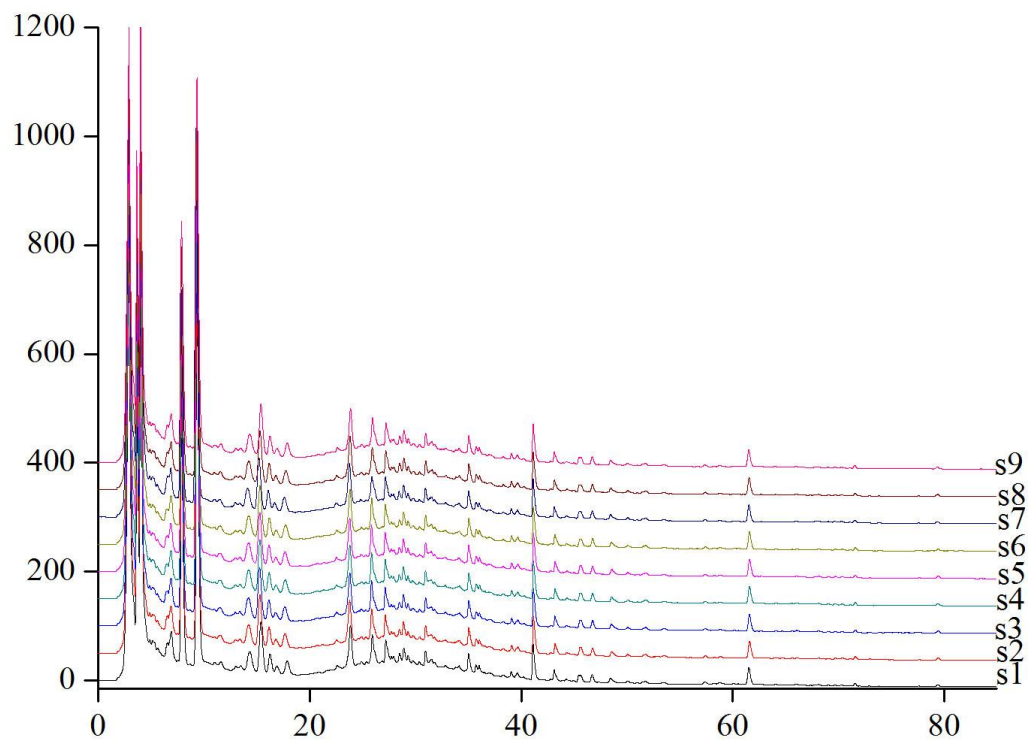

Figure 2 Similarity analysis of chromatographic nine XYZ samples.
